# Supplementary material
Source: PubMed Central journal article supplement (PMC9359336)

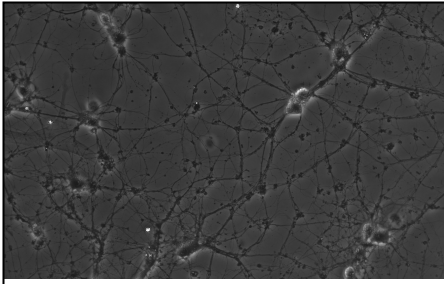

DMSO + DMSO 48 hours

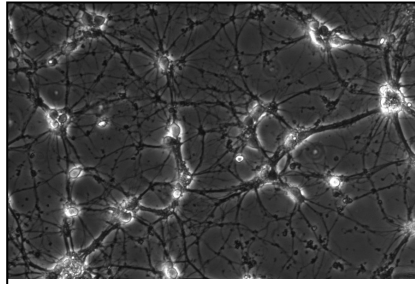

No virus + DMSO 48 hours

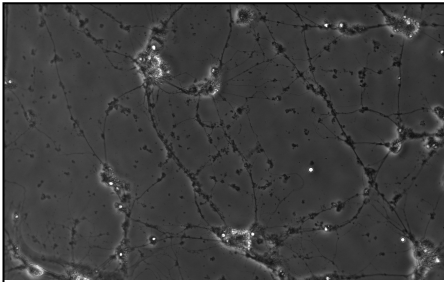

DMSO + LB-100 48 hours

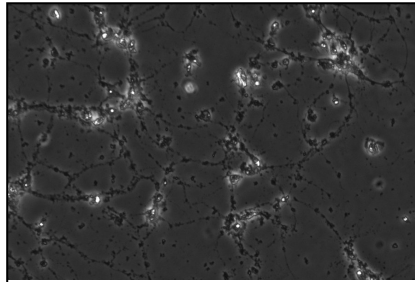

No virus + LB-100 48 hours

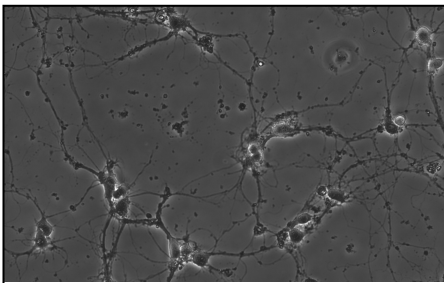

DLKi + LB-100 48 hours

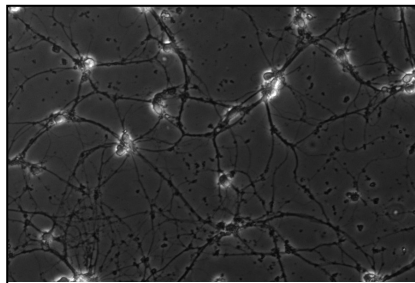

BCLXL + LB-100 48 hours

Supplement: NIHMS1825966-supplement-Supplemental_Figure_1.pdf [file NIHMS1825966-supplement-Supplemental_Figure_1.pdf]

**A**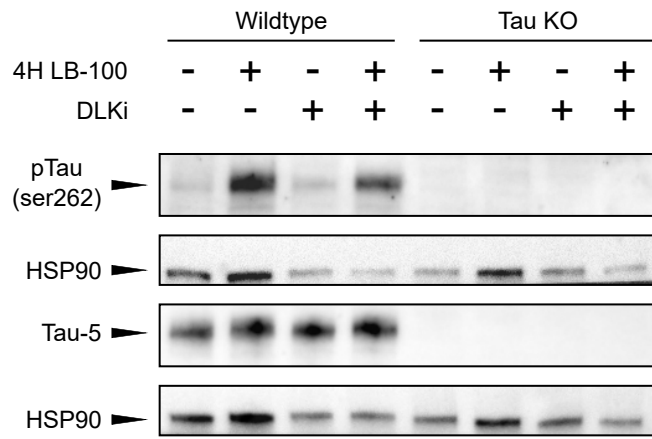**B**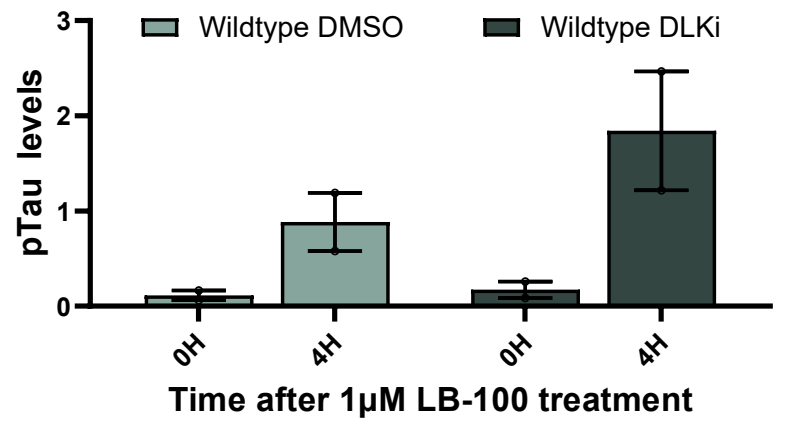

Supplement: NIHMS1825966-supplement-Supplemental_Figure_2.pdf [file NIHMS1825966-supplement-Supplemental_Figure_2.pdf]
